# Supplementary material
Source: PubMed Central journal article supplement (PMC7118247)

SUPPLEMENTARY DATA

**Supplementary Figure 1. Study protocol.** After an overnight fast, two intravenous catheters were placed and the infusion of inulin/iohexol and PAH commenced with a 10 minute bolus which was followed by continuous infusion for the remainder of the protocol. The participants then had two hours of bed rest before the hyperinsulinaemic-euglycemic clamp was started by the infusion of insulin at 40 mU/m<sup>2</sup>·min. Blood glucose was maintained at 5 mmol/l by variable 20% glucose infusion. After 90 minutes of equilibration, there were two urine collection periods of 45 minutes to measure urinary excretion of the renal tracers. In the last 30 minutes of the clamp, glucose infusion rate was measured to objectify insulin sensitivity (M-value). Time is shown in minutes. <sup>#</sup>Bolus infusion in the first 10 minutes. Abbreviations: GIR, glucose infusion rate;

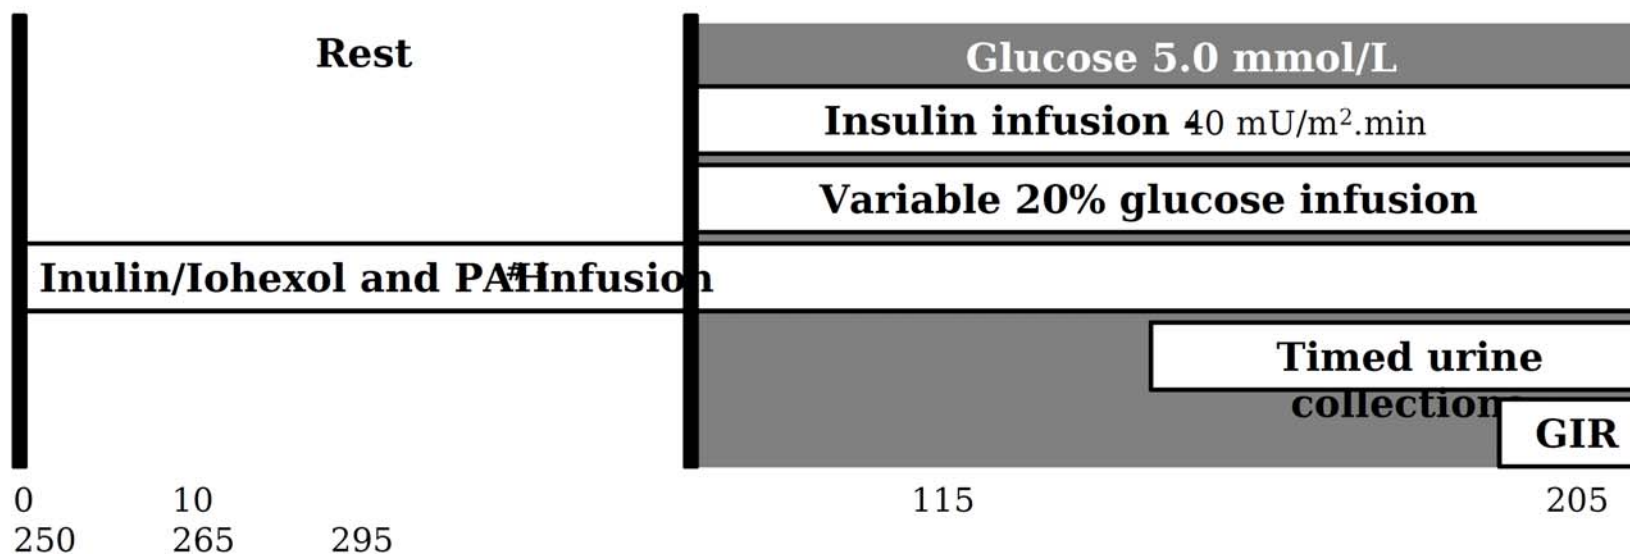

Supplement: DC191651SupplementaryData.pdf [file DC191651SupplementaryData.pdf]
